# Supplementary material
Source: PubMed Central journal article supplement (PMC6597352)

## Supporting Information

Additional Supporting Information may be found in the online version of this article:

**Figure S1.** Allergic sensitization to thirteen allergens measured by ImmunoCAP (CAP), skin prick test (SPT) and MeDALL-chip at 10 and 16 years.

**Table S1.** The allergen components in the MeDALL-chip. The MeDALL-chip Inhalation comprises of those marked with Inh.

**Table S2.** Relative risk (RR) and absolute risk (AR) for patients with a positive test to current rhinitis or asthma at the same age with confident interval for asthma and rhinitis at 10 and 16 years.

**Data S1.** Subject and methods.

# Table 1 Online supplement

Table 1 online supplement

| Allergen source   | Allergens                                                                                                                                                                                                                                              | Common route of exposure          |
|-------------------|--------------------------------------------------------------------------------------------------------------------------------------------------------------------------------------------------------------------------------------------------------|-----------------------------------|
| Birch             | Bet v 1, Bet v 2, Bet v 4                                                                                                                                                                                                                              | Inh                               |
| Alder             | Aln g 1                                                                                                                                                                                                                                                | Inh                               |
| Olive             | Ole e 1, Ole e 7, Ole e 9                                                                                                                                                                                                                              | Inh                               |
| Japanese cedar    | Cry j 1                                                                                                                                                                                                                                                | Inh                               |
| Cypress           | Cup a 1                                                                                                                                                                                                                                                | Inh                               |
| Plane tree        | Pla a 1, Pla a 2, Pla a 3                                                                                                                                                                                                                              | Inh                               |
| Timothy grass     | Phl p 1, Phl p 2, Phl p 4, Phl p 5b, Phl p 6, Phl p 7, Phl p 11, Phl p 12                                                                                                                                                                              | Inh                               |
| Bermuda grass     | Cyn d 1                                                                                                                                                                                                                                                | Inh                               |
| Ragweed           | Amb a 1                                                                                                                                                                                                                                                | Inh                               |
| Mugwort           | Art v 1, Art v 3                                                                                                                                                                                                                                       | Inh                               |
| Goosefoot         | Che a 1                                                                                                                                                                                                                                                | Inh                               |
| Annual mercury    | Mer a 1                                                                                                                                                                                                                                                | Inh                               |
| Plantain          | Pla l 1                                                                                                                                                                                                                                                | Inh                               |
| Wall pellitory    | Par j 2                                                                                                                                                                                                                                                | Inh                               |
| Saltwort          | Sal k 1                                                                                                                                                                                                                                                | Inh                               |
| Latex             | Hev b 1, Hev b 3, Hev b 5, Hev b 6.01, Hev b 8                                                                                                                                                                                                         | Inh                               |
| Alternaria        | Alt f 1, Alt f 6                                                                                                                                                                                                                                       | Inh                               |
| Apergillus        | Asp f 1, Asp f 3, Asp f 6                                                                                                                                                                                                                              | Inh                               |
| Cladosporium      | Cla h 8                                                                                                                                                                                                                                                | Inh                               |
| House dust mite   | Der p 1, Der f 1, Der p 2, der f 2, Der p 4, der p 5, Der p 7, Der p 10, Der p 11, Der p 14, Der p 15, Der p 18, Der p 21, Der p 23, clone 16                                                                                                          | Inh                               |
| Storage mite      | Lep d 2                                                                                                                                                                                                                                                | Inh                               |
| Blomia tropicalis | Blo t 5                                                                                                                                                                                                                                                | Inh                               |
| Cockroach         | Bla g 1, Bla g 2, Bla g 5, Bla g 7                                                                                                                                                                                                                     | Inh                               |
| Cat               | Fle d 1, Fel d 2, fel d 4                                                                                                                                                                                                                              | Inh                               |
| Dog               | Can f 1, Can f 2, can f 3, can f 4, Can f 5, Can f 5, Can f 6                                                                                                                                                                                          | Inh                               |
| Horse             | Equ c 1, Equ c 3                                                                                                                                                                                                                                       | Inh                               |
| Mouse             | Mus m 1                                                                                                                                                                                                                                                | Inh                               |
| Peanut            | Ara h 1, Ara h 1, Ara h 2, Ara h 3, Ara h 3, Ara h 6, Ara h 6, Ara h 8, Ara h 9                                                                                                                                                                        | Food                              |
| Hazelnut          | Cor a 1.0401, Cor a 8, Cor a 9                                                                                                                                                                                                                         | Food, (Cor a 1.0401:Food and Inh) |
| Walnut            | Jug r 1, Jug r 2, Jug r 3                                                                                                                                                                                                                              | Food                              |
| Almond            | Pru du 3, Pru du 4, Pru du 6, Pru du 6.01, Pru du 6.02                                                                                                                                                                                                 | Food                              |
| Cashew nut        | Ana o 1, Ana o 2, Ana o 2, Ana o 2                                                                                                                                                                                                                     | Food                              |
| Pistachio         | Pis v 3                                                                                                                                                                                                                                                | Food                              |
| Brazil nut        | Ber e 1                                                                                                                                                                                                                                                | Food                              |
| Sesame            | Ber e 1                                                                                                                                                                                                                                                | Food                              |
| Soy               | Gly m 4, Gly m 5, Gly m 6                                                                                                                                                                                                                              | Food                              |
| Wheat             | Tri a 14 (f,i), Tri a 19.0101 (f), Tri aA TI (f,i), Tri a 36 (191-369) (f,i), Tri a 36 (f,i), m43 (f), m82 (f), Tri a 39 (#10) (i), Tri a Trx (#37) (i), Tri a GST (#38) (i), Tri a 12 (#123) (f,i), Tri a DH (#126) (i), Tri a 37 (f), Tri a 14 (f,i) | Food (f) and inhalation (i)       |
| Buckwheat         | Fag e 2                                                                                                                                                                                                                                                | Food                              |
| Kiwi              | Act d 1, Act d 2, Act d 5, Act d 8                                                                                                                                                                                                                     | Food                              |
| Apple             | Mal d 1                                                                                                                                                                                                                                                | Food                              |
| Peach             | Pru p 1, Pru p 3                                                                                                                                                                                                                                       | Food, (Pru p3 also skin)          |
| Pineapple         | Ana c 2.0101                                                                                                                                                                                                                                           | Food, inh                         |
| Cow's milk        | Bos d 4, Bos d 5, Bos d 6, Bos d 8, Bos d Lactoferrin, Bos d 4, Bos d 5, Bos d 6, Bos d 8, Bos d 9, Bos d 10, Bos d 11, Bos d 12, Bos d Lactoferrin,                                                                                                   | Food                              |
| Egg white         | Gal d 1, Gal d 2, Gal d 3                                                                                                                                                                                                                              | Food                              |
| Egg yolk/chicken  | Gal d 5                                                                                                                                                                                                                                                | Food                              |
| Codfish           | Gad c 1                                                                                                                                                                                                                                                | Food                              |
| Shrimp            | Pen m 1, Pen m 2, Pen m 4                                                                                                                                                                                                                              | Food                              |

Table 2 Online supplement

| A                 | Current rhinitis | Current asthma | Current rhinitis | Current asthma |
|-------------------|------------------|----------------|------------------|----------------|
|                   | 10y              | 10y            | 16y              | 16y            |
|                   | RR (conf.int.)   | RR(conf. Int.) | RR(con.f int.)   | RR(conf.int.)  |
| MeDALL-chip       | 1.4 (1.2-1.6)    | 1.1 (1.0-1.2)  | 1.9 (1.6-2.3)    | 1.1 (1.0-1.2)  |
| MeDALL-chip Inhal | 1.4 (1.2-1.7)    | 1.1 (1.0-1.2)  | 1.9 (1.6-2.3)    | 1.1 (1.0-1.2)  |
| ImmunoCAP         | 1.5 (1.3-1.8)    | 1.1 (1.0-1.2)  | 2.1 (1.7-2.5)    | 1.1 (1.0-1.2)  |
| ImmunoCAP Inhal   | 1.6 (1.4-2.0)    | 1.2 (1.0-1.3)  | 2.1 (1.7-2.6)    | 1.1 (1.0-1.3)  |
| SPT               | 1.8 (1.4-2.3)    | 1.1 (1.0-1.3)  | 1.8 (1.5-2.2)    | 1.1 (1.0-1.2)  |
| SPT Inhal         | 1.8 (1.5-2.3)    | 1.1 (1.0-1.3)  | 1.9 (1.5-2.3)    | 1.1 (1.0-1.2)  |

  

| B                 | Current rhinitis    | Current asthma      | Current rhinitis    | Current asthma      |
|-------------------|---------------------|---------------------|---------------------|---------------------|
|                   | 10y                 | 10y                 | 16y                 | 16y                 |
|                   | AR (conf.int.)      | AR(conf. Int.)      | AR(con.f int.)      | AR(conf.int.)       |
| MeDALL-chip       | 0.95 ( 0.91 - 0.98) | 0.96 ( 0.92 - 0.99) | 0.89 ( 0.83 - 0.94) | 0.90 ( 0.84 - 0.95) |
| MeDALL-chip Inhal | 0.95 ( 0.91 - 0.98) | 0.96 ( 0.92 - 0.99) | 0.89 ( 0.83 - 0.94) | 0.92 ( 0.86 - 0.95) |
| ImmunoCAP         | 0.96 ( 0.91 - 0.98) | 0.97 ( 0.93 - 0.99) | 0.90 ( 0.84 - 0.95) | 0.92 ( 0.86 - 0.96) |
| ImmunoCAP Inhal   | 0.96 ( 0.92 - 0.98) | 0.97 ( 0.93 - 0.99) | 0.90 ( 0.84 - 0.94) | 0.92 ( 0.86 - 0.96) |
| SPT               | 0.95 ( 0.92 - 0.98) | 0.96 ( 0.92 - 0.98) | 0.85 ( 0.78 - 0.91) | 0.89 ( 0.82 - 0.93) |
| SPT Inhal         | 0.95 ( 0.92 - 0.98) | 0.96 ( 0.92 - 0.98) | 0.86 ( 0.79 - 0.91) | 0.89 ( 0.83 - 0.94) |

Fig 1 online suppl

A

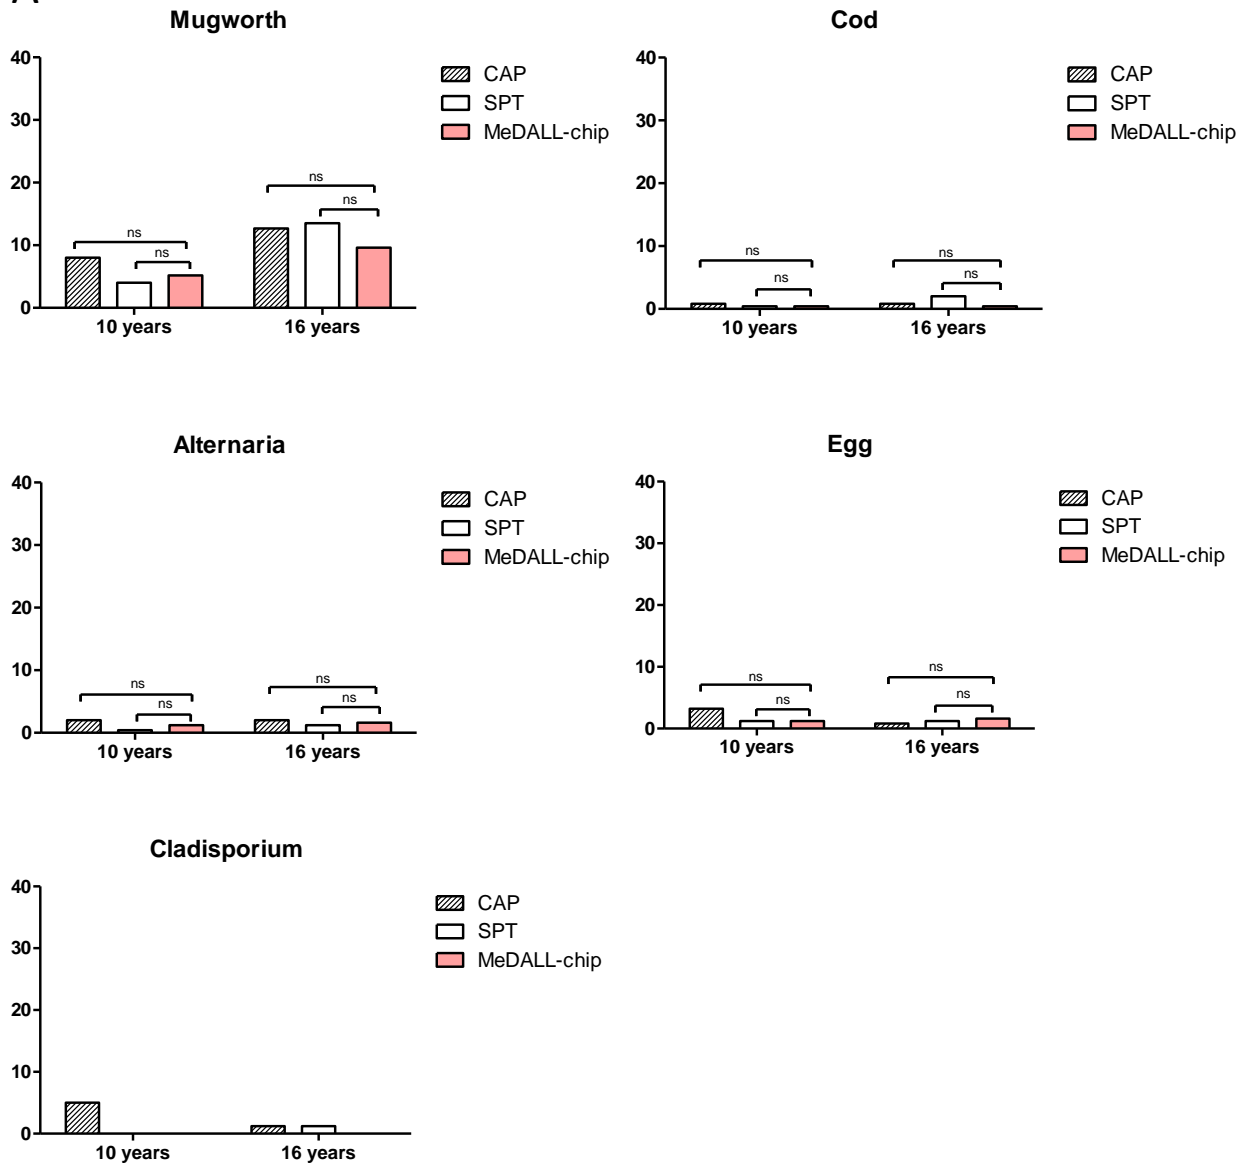

**B**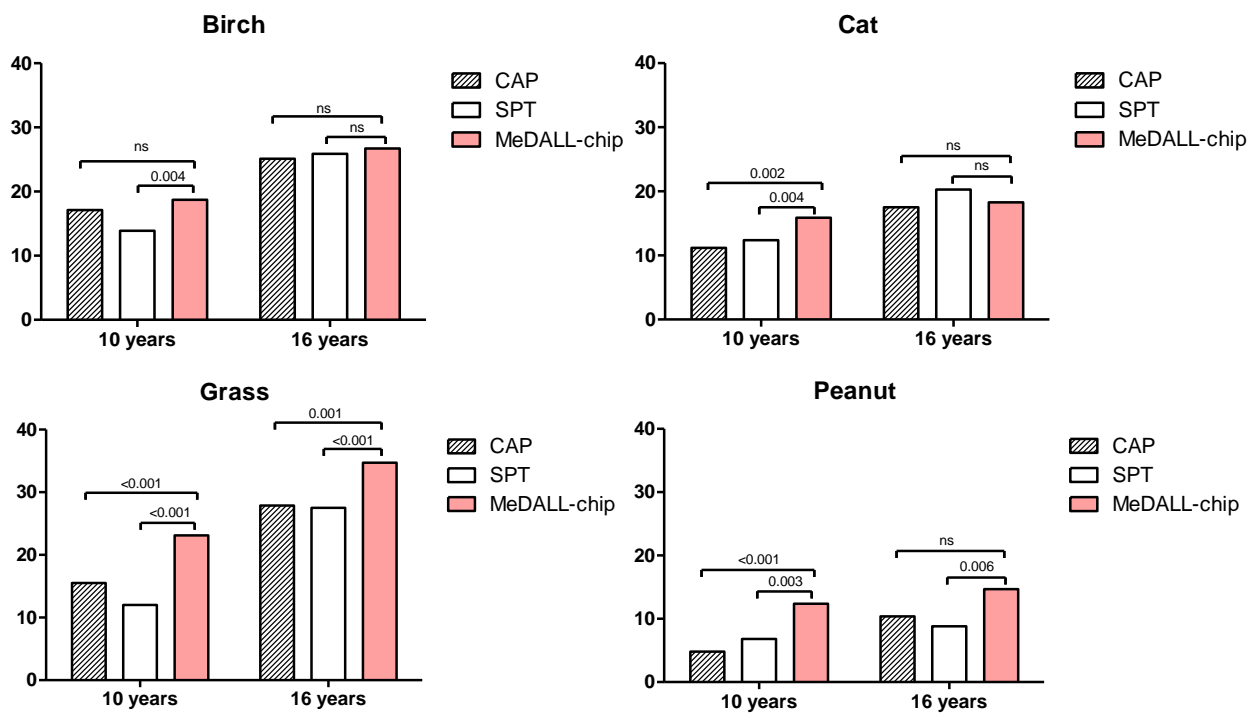

C

HDM

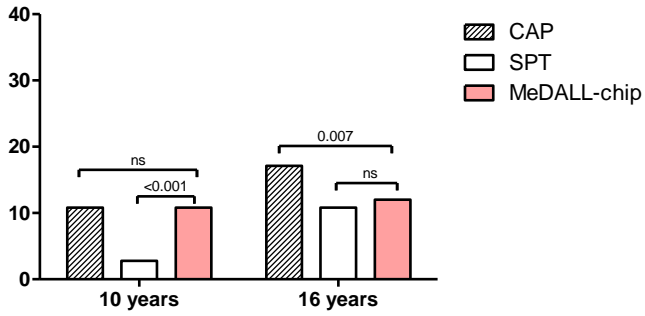

Milk

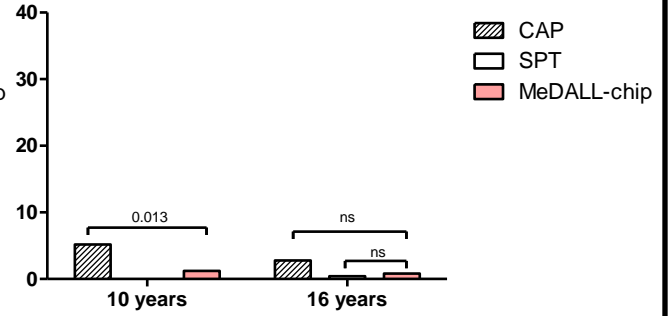

Dog

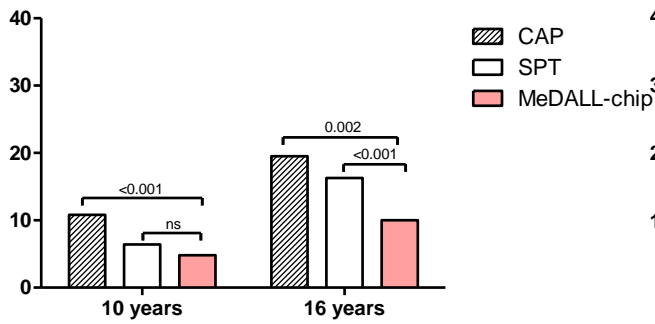

Blatella

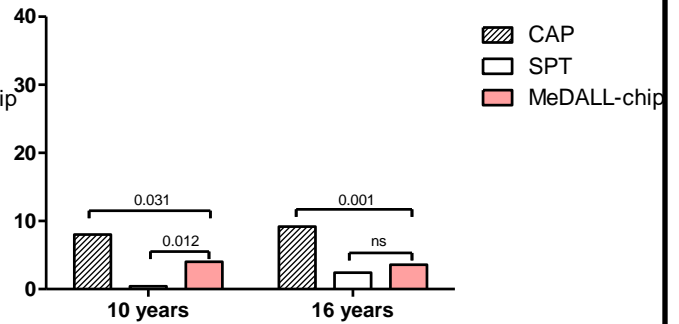

Supplement: EMS83024-supplement-Supplementary_figure_and_tables.pdf [file EMS83024-supplement-Supplementary_figure_and_tables.pdf]
